# Supplementary material for: Genomic and Epigenomic Landscaping Defines New Therapeutic Targets for Adenosquamous Carcinoma of the Pancreas
Source: Oxford University Press journal article supplement (doi:10.1158/0008-5472.can-20-0078), 2020-09-14
Supplement: 00085472can200078-sup-235227_3_supp_6429092_qdj3g1.docx [file 00085472can200078-sup-235227_3_supp_6429092_qdj3g1.docx]

| **Supplemental Table 1**  **Types of ASCP Specimen** | |
| --- | --- |
| **Resected** | **Metastatic** |
| **Primary** |  |
| **A15** | **9R panc (primary)** |
| **A53** | **9R met 1 (perigastric)** |
| **A90** | **9R met2 (liver)** |
| **A120** | **9R met 3 (lung)** |
| **MR02** |  |
| **PENN040** |  |
|  |  |
| **PDX** |  |
| **PAX139** |  |
| **PAX208** |  |
| **PAX217** |  |
| **PAX232** |  |
| **PAX265** |  |
